# Supplementary material for: The NBO pattern in luminescent chromophores: unravelling excited-state features using TD-DFT
Source: Royal Society of Chemistry journal article supplement (doi:10.1039/c3cp50669j), 2013-01-01
Supplement: c3cp50669j.pdf [file c3cp50669j.pdf]

# The NBO Pattern in Luminescent Chromophores: Unravelling Excited-State Features with TD-DFT

## Supporting Information

Boris Le Guennic\*, Siwar Chibani, Azzam Charaf-Eddin, Julien Massue, Raymond Ziessel, Gilles Ulrich\* and Denis Jacquemin\*

### 1. Additional methodological testing

#### 1.a. Comparisons between M06-2X and $\omega$ B97X-D values

Table S-1: Computed (SS,neq) wavelengths for the first two compounds using two functionals

| Compound | M06-2X | $\omega$ B97X-D |
|----------|--------|-----------------|
| 1        | 347 nm | 337 nm          |
|          | 275 nm | 276 nm          |
| 2        | 327 nm | 324 nm          |
|          | 300 nm | 296 nm          |

Table S-2: Computed  $\omega$ B97X-D wavelengths for compound 1 using several atomic basis sets. All calculations on the  $\omega$ B97X-D/6-31G(d) geometry with the PCM model in toluene.

| Basis set     | (LR,eq) |
|---------------|---------|
| 6-31G(d)      | 332 nm  |
| 6-31+G(d)     | 335 nm  |
| 6-311G(d,p)   | 335 nm  |
| 6-311++G(d,p) | 338 nm  |
| 6-311+G(2d,p) | 339 nm  |

### 2. Representation of frontier MO for dyes 1-9

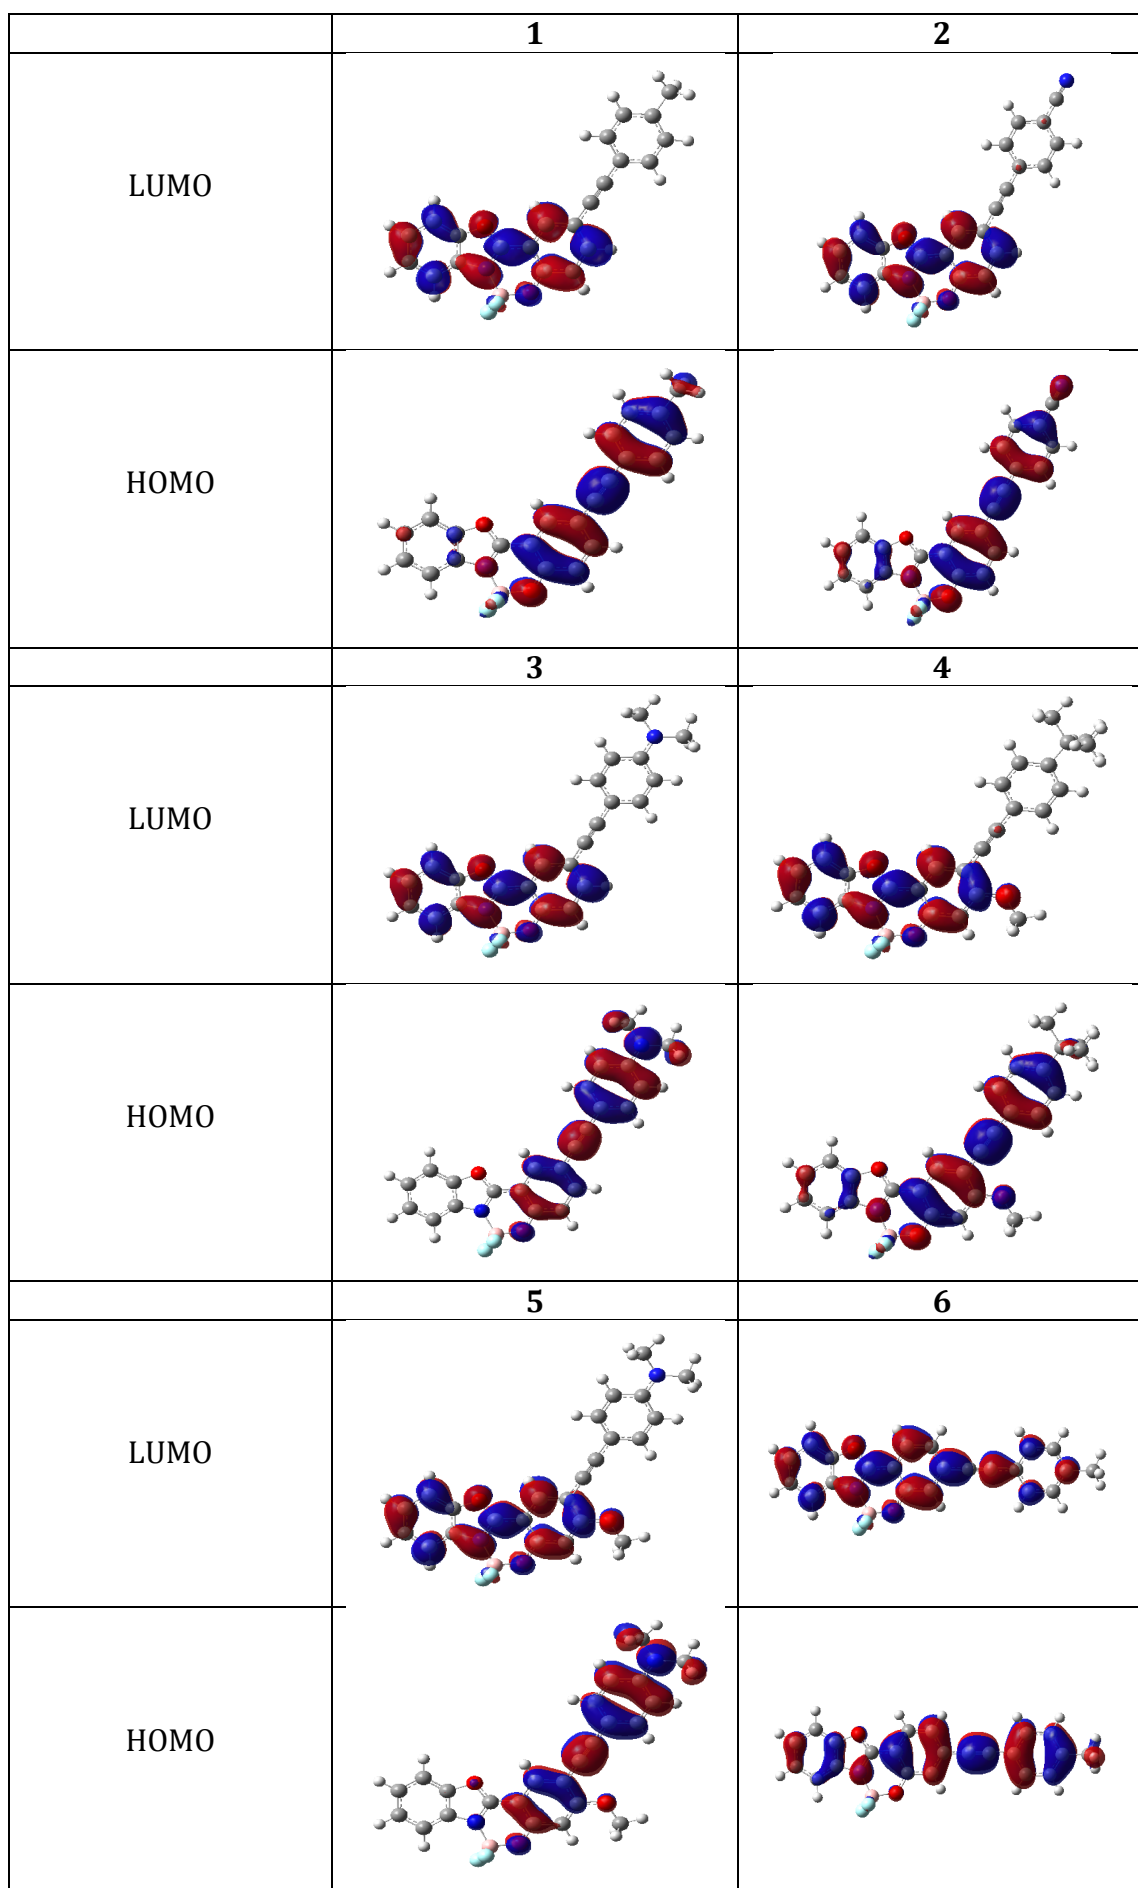

|      | 7                                                                                   | 8                                                                                   |
|------|-------------------------------------------------------------------------------------|-------------------------------------------------------------------------------------|
| LUMO |    |  |
| HOMO |    |  |
|      | 9                                                                                   |                                                                                     |
| LUMO |   |                                                                                     |
| HOMO |  |                                                                                     |
